# Supplementary material for: Design and Construction of an Equibiaxial Cell Stretching System That Is Improved for Biochemical Analysis
Source: PubMed Central journal article supplement (PMC3953117; doi:10.1371/journal.pone.0090665), 2014-03-13
Supplement: pone.0090665.s002.pdf [file pone.0090665.s002.pdf]

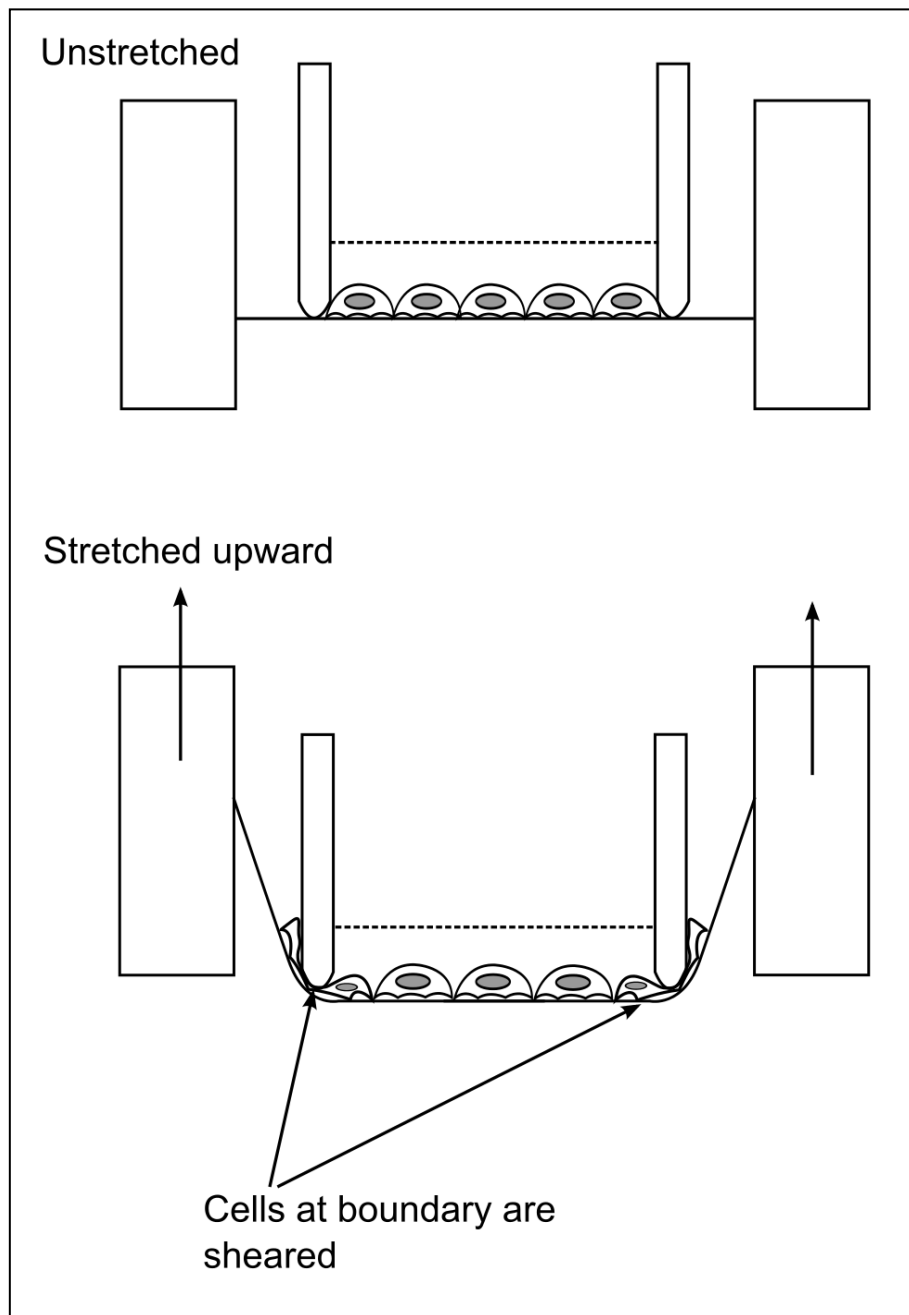

**Figure S2. Inverting the configuration of indenter and membrane leads to cell shearing at the boundary.** In some of the existing devices, the indenter is placed on the upper surface of the membrane. While a well for cell culture is created by the indenter, cells on the periphery may undergo shearing between the indenter and the membrane upon stretching.
